# Supplementary material for: A quantum mechanical study of TiCl3α, β and γ crystal phases: geometry, electronic structure and magnetism
Source: Royal Society of Chemistry journal article supplement (doi:10.1039/b917013h), 2009-01-01
Supplement: b917013h.pdf [file b917013h.pdf]

### Basis set optimized and adopted for Ti and Cl atoms

---

| Ti 7 shells |          |         | Cl 5 shells |          |         |
|-------------|----------|---------|-------------|----------|---------|
| S 8         |          |         | S 8         |          |         |
| 225338.0    | 0.000228 |         | 135320.     | 0.000225 |         |
| 32315.0     | 0.001929 |         | 19440.      | 0.00191  |         |
| 6883.61     | 0.011100 |         | 4130.       | 0.01110  |         |
| 1802.14     | 0.05     |         | 1074.       | 0.04989  |         |
| 543.063     | 0.17010  |         | 323.4       | 0.1703   |         |
| 187.549     | 0.369    |         | 111.1       | 0.3683   |         |
| 73.2133     | 0.4033   |         | 43.4        | 0.4036   |         |
| 30.3718     | 0.1445   |         | 18.18       | 0.1459   |         |
| SP 6        |          |         | SP 6        |          |         |
| 554.042     | -0.0059  | 0.0085  | 324.8       | -0.00763 | 0.00820 |
| 132.525     | -0.0683  | 0.0603  | 73.00       | -0.0829  | 0.0605  |
| 43.6801     | -0.1245  | 0.2124  | 23.71       | -0.1046  | 0.2115  |
| 17.2243     | 0.2532   | 0.3902  | 9.138       | 0.2540   | 0.3765  |
| 7.2248      | 0.6261   | 0.4097  | 3.930       | 0.695    | 0.3967  |
| 2.4117      | 0.282    | 0.2181  | 1.329       | 0.399    | 0.186   |
| SP 4        |          |         | SP 4        |          |         |
| 24.4975     | 0.0175   | -0.0207 | 4.755       | -0.3740  | -0.0340 |
| 11.4772     | -0.2277  | -0.0653 | 1.756       | -0.4754  | 0.1617  |
| 4.4653      | -0.7946  | 0.1919  | 0.785       | 1.3400   | 0.9250  |
| 1.8904      | 1.0107   | 1.3778  | SP 1        |          |         |
| SP 1        |          |         | 0.294       | 1.       | 1.      |
| 0.8099      | 1.0      | 1.0     | SP 1        |          |         |
| SP 1        |          |         | 0.10        | 1.       | 1.      |
| 0.3242      | 1.0      | 1.0     | D 1         |          |         |
| D 3         |          |         | 0.75        |          |         |
| 7.6781      | 0.1127   |         |             |          |         |
| 1.8117      | 0.3927   |         |             |          |         |
| 0.463       | 0.5206   |         |             |          |         |
| D 1         |          |         |             |          |         |
| 1.0         | 0.2      |         |             |          |         |

---

### Phase $\alpha$

#### FM

\_symmetry\_space\_group\_name\_H-M 'P3'

\_symmetry\_Int\_Tables\_number 143

\_symmetry\_cell\_setting trigonal

loop\_

\_symmetry\_equiv\_pos\_as\_xyz

x,y,z

-y,x-y,z

-x+y,-x,z

```
_cell_length_a      6.2839
_cell_length_b      6.2839
_cell_length_c      17.1459
_cell_angle_alpha   90.0000
_cell_angle_beta    90.0000
_cell_angle_gamma   120.0000
loop_
_atom_site_label
_atom_site_type_symbol
_atom_site_fract_x
_atom_site_fract_y
_atom_site_fract_z
_atom_site_U_iso_or_equiv
_atom_site_adp_type
_atom_site_occupancy
C11  C1  0.35759  0.00075  0.07947  0.00000  Uiso  1.00
C12  C1  -0.35755 -0.00075 -0.07949  0.00000  Uiso  1.00
C13  C1  -0.33409 -0.30975  0.41284  0.00000  Uiso  1.00
C14  C1  0.33260  0.02367 -0.25383  0.00000  Uiso  1.00
C15  C1  0.30902  0.33256  0.25385  0.00000  Uiso  1.00
C16  C1  -0.02417 -0.33408 -0.41281  0.00000  Uiso  1.00
Ti7  Ti  0.00000  0.00000  0.33366  0.00000  Uiso  1.00
Ti8  Ti  0.00000  0.00000 -0.33363  0.00000  Uiso  1.00
Ti9  Ti  0.33333 -0.33333  0.33302  0.00000  Uiso  1.00
Ti10 Ti  0.33333 -0.33333  0.00027  0.00000  Uiso  1.00
Ti11 Ti  -0.33333  0.33333 -0.33307  0.00000  Uiso  1.00
Ti12 Ti  -0.33333  0.33333 -0.00030  0.00000  Uiso  1.00
```

### Phase $\beta$

#### AFM

```
_symmetry_space_group_name_H-M 'P-31M'
_symmetry_Int_Tables_number  162
_symmetry_cell_setting      trigonal
loop_
_symmetry_equiv_pos_as_xyz
x,y,z
-y,x-y,z
-x+y,-x,z
-y,-x,-z
-x+y,y,-z
x,x-y,-z
-x,-y,-z
y,-x+y,-z
x-y,x,-z
y,x,z
x-y,-y,z
-x,-x+y,z
_cell_length_a      6.2066
_cell_length_b      6.2066
_cell_length_c      5.8825
_cell_angle_alpha   90.0000
_cell_angle_beta    90.0000
_cell_angle_gamma   120.0000
loop_
_atom_site_label
```

```
_atom_site_type_symbol  
_atom_site_fract_x  
_atom_site_fract_y  
_atom_site_fract_z  
_atom_site_U_iso_or_equiv  
_atom_site_adp_type  
_atom_site_occupancy  
Ti Ti 0.00000 0.00000 -0.00000 0.00000 Uiso 1.00  
Fe Fe 0.00000 0.00000 -0.50000 0.00000 Uiso 1.00  
Cl Cl 0.31098 0.00000 0.25000 0.00000 Uiso 1.00
```

### Phase $\gamma$

#### FM

```
_symmetry_space_group_name_H-M 'P3112'  
_symmetry_Int_Tables_number 151  
_symmetry_cell_setting trigonal  
loop_  
_symmetry_equiv_pos_as_xyz  
x,y,z  
-y,x-y,z+1/3  
-x+y,-x,z+2/3  
-y,-x,-z+2/3  
-x+y,y,-z+1/3  
x,x-y,-z  
_cell_length_a 6.2818  
_cell_length_b 6.2818  
_cell_length_c 17.2134  
_cell_angle_alpha 90.0000  
_cell_angle_beta 90.0000  
_cell_angle_gamma 120.0000  
loop_  
_atom_site_label  
_atom_site_type_symbol  
_atom_site_fract_x  
_atom_site_fract_y  
_atom_site_fract_z  
_atom_site_U_iso_or_equiv  
_atom_site_adp_type  
_atom_site_occupancy  
Cl1 Cl 0.08725 -0.11309 0.58793 0.00000 Uiso 1.00  
Cl2 Cl 0.44371 -0.47138 0.58687 0.00000 Uiso 1.00  
Cl3 Cl -0.19919 0.24404 0.58771 0.00000 Uiso 1.00  
Ti4 Ti 0.11054 -0.11054 0.33333 0.00000 Uiso 1.00  
Ti5 Ti -0.22320 0.22320 0.33333 0.00000 Uiso 1.00
```
